# Supplementary material for: Identification of Daboia siamensis venome using integrated multi-omics data
Source: PubMed Central journal article supplement (PMC9338987; doi:10.1038/s41598-022-17300-1), 2022-07-30
Supplement: 41598_2022_17300_MOESM1_ESM.pdf [file 41598_2022_17300_MOESM1_ESM.pdf]

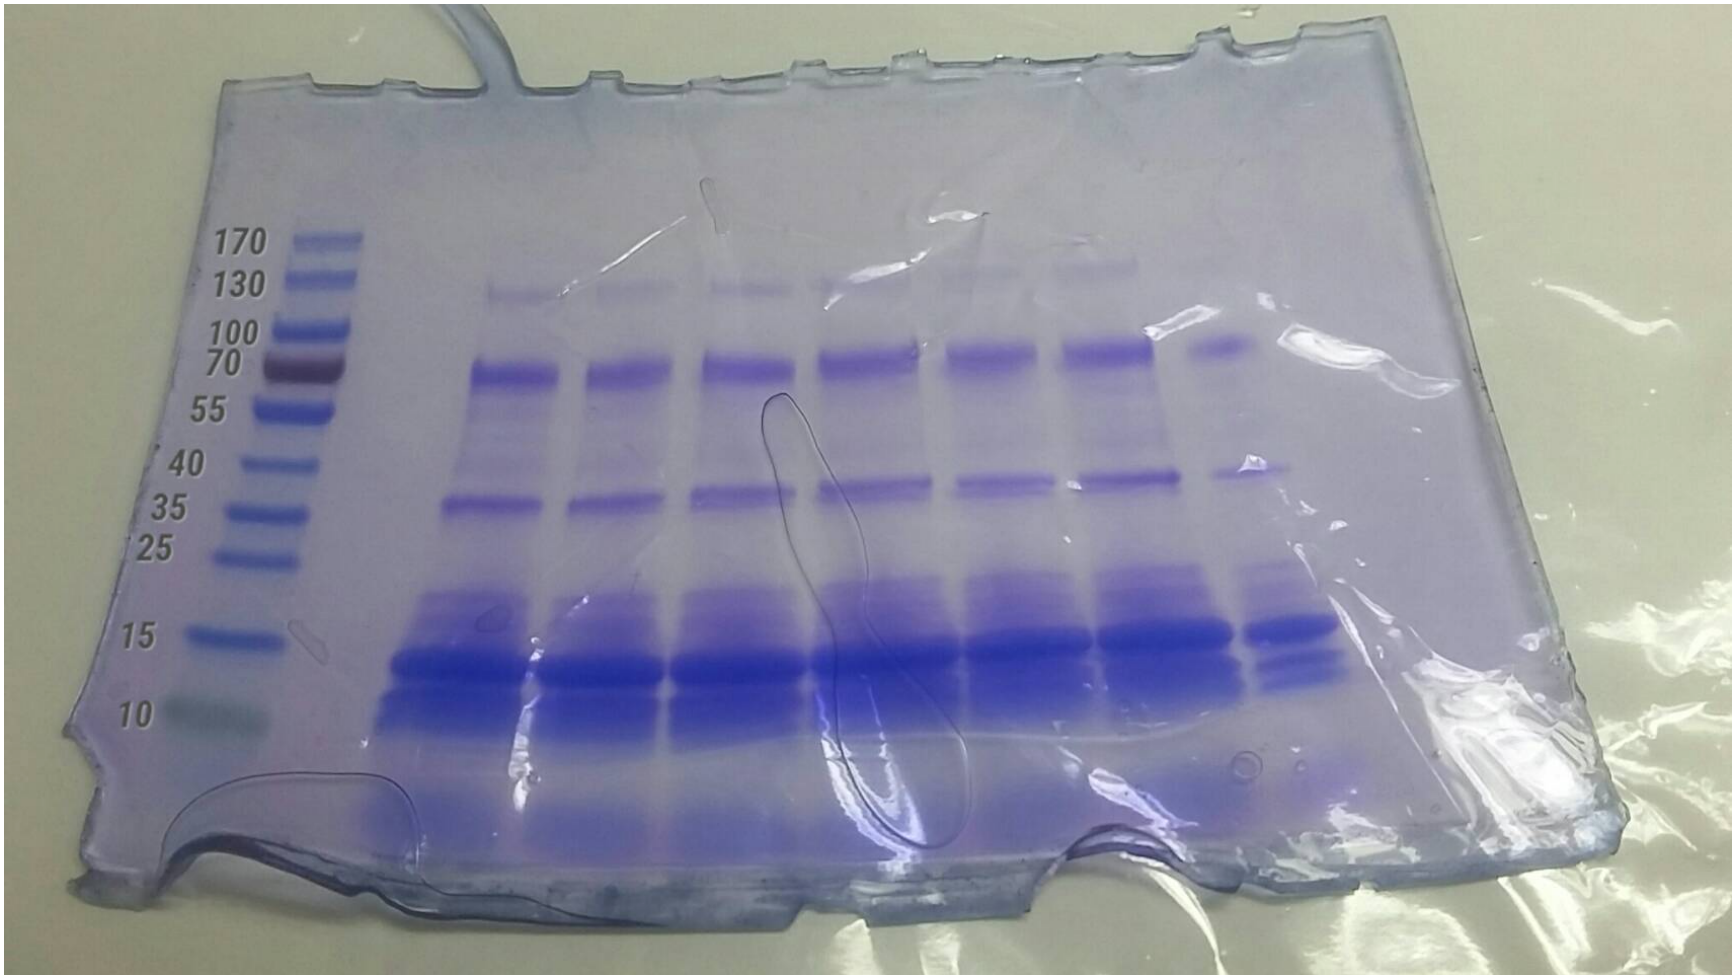

**Figure S1.** Venom SDS-PAGE gel. Venom sample was loaded for 7 lanes.
