# Supplementary material for: Identification of Daboia siamensis venome using integrated multi-omics data
Source: PubMed Central journal article supplement (PMC9338987; doi:10.1038/s41598-022-17300-1), 2022-07-30
Supplement: 41598_2022_17300_MOESM2_ESM.pdf [file 41598_2022_17300_MOESM2_ESM.pdf]

|           |     |                                                                |     |
|-----------|-----|----------------------------------------------------------------|-----|
| CDS 16116 | 1   | MQAKAPMYPNEPFLVFWNAPTTCQCRMRYKVDLDLKTFFHIVTNANDSLSGSAVTIFYPNHL | 60  |
| A3QVN3    | 24  | MQAKAPMY NEPFLVFWNAPTTCQR+RYKVDLDLKTFFHIV+NANDSLSGSAVTIFYPNHL  | 83  |
| CDS 16116 | 61  | GVYPHIDDRGHFFHGIIPQNESLTKHLDKSKSDINRIIPLNTFHGLGVIDWENWRPQWDR   | 120 |
| A3QVN3    | 84  | GVYPHIDDRGHFFHGIIPQNESLTKHL+KSKSDINRIIPL FHGLGVIDWENWRPQWDR    | 143 |
| CDS 16116 | 121 | NWGSKNVYRNRSIQFAKVLHPQLSEDKIRRLAKKQYEKAAKSFMRDTLLLAEMRPNGYW    | 180 |
| A3QVN3    | 144 | NWGSKNVYRNRSIQFA+ LHP+LSEDKIRRLAKK+YEKAAKSFMRDTLLLAEMRP+GYW    | 203 |
| CDS 16116 | 181 | GYLYPDCQNYDYKTKGDQYTGKCP EIEMSRNDQLLWLRDSTALFPNVYLEIILRSSN     | 240 |
| A3QVN3    | 204 | GYLYPDCQNYDYKTKGDQYTGKCP EIEMSRNDQLLWLRDSTALFPNVYLEIILRSS+N    | 263 |
| CDS 16116 | 241 | ALKFVHHLKESMRIASMAREDYALPVFAYARPFYAYTFEPLTQ                    | 284 |
| A3QVN3    | 264 | ALKFVHHLKESMRIASMAREDYALPVFAYARPFYAYTFEPLTQ                    | 307 |

E-value: 0.0  
 Score: 1494  
 Ident.: 95.4%  
 Positives : 98.6%  
 Query Length: 290  
 Match Length: 449

**Figure S2.** Pairwise alignment of hyaluronidase-1 proteins.
