# Supplementary material for: Identification of Daboia siamensis venome using integrated multi-omics data
Source: PubMed Central journal article supplement (PMC9338987; doi:10.1038/s41598-022-17300-1), 2022-07-30
Supplement: 41598_2022_17300_MOESM3_ESM.pdf [file 41598_2022_17300_MOESM3_ESM.pdf]

**Table S1.** Statistics of raw genomic reads used in the assembly process

| Measurement                                  | Value    | Ideal Value <sup>†</sup> |
|----------------------------------------------|----------|--------------------------|
| Number of reads                              | 944.31 M | -                        |
| Read length                                  | 150 bp   | -                        |
| Mean read length after trimming              | 138.5 b  | 140 b                    |
| Raw coverage                                 | 69.38 x  | ~56 x                    |
| Effective read coverage                      | 42.19 x  | ~42x for raw 56x         |
| Fraction of Q30 bases in read 2              | 76.81 %  | 75-85%                   |
| Median insert size                           | 361 b    | 350-400 b                |
| Fraction of proper read pairs                | 87.93%   | >=75%                    |
| Fraction of barcodes used                    | 1        | -                        |
| Estimated genome size                        | 2.04 Gb  | -                        |
| Genome repetitivity index                    | 15.49%   | -                        |
| High AT index                                | 0.07%    | -                        |
| Dinucleotide content                         | 0.44%    | -                        |
| Molecule count extending 10 kb on both sides | 17.06    | 10 kb                    |
| Mean distance between heterozygous SNPs      | 1.72 Kb  | -                        |
| Fraction of reads that are not barcoded      | 6.31%    | -                        |
| N50 reads per barcode                        | 744      | -                        |
| Fraction of reads that are duplicates        | 28.48%   | -                        |
| Nonduplicate and phased reads                | 37.83%   | 45-50%                   |

<sup>†</sup>the ideal statistics are define by Supernova <sup>1</sup>.

### References

- 1 Weisenfeld, N. I., Kumar, V., Shah, P., Church, D. M. & Jaffe, D. B. Direct determination of diploid genome sequences. *Genome Res* 27, 757-767, doi:10.1101/gr.214874.116 (2017).
