# Supplementary material for: Identification of Daboia siamensis venome using integrated multi-omics data
Source: PubMed Central journal article supplement (PMC9338987; doi:10.1038/s41598-022-17300-1), 2022-07-30
Supplement: 41598_2022_17300_MOESM4_ESM.pdf [file 41598_2022_17300_MOESM4_ESM.pdf]

**Table S2.** Contig and scaffold statistics of this study

| <b>Measurement</b>              | <b>Value</b> | <b>Description</b>                                    |
|---------------------------------|--------------|-------------------------------------------------------|
| Number of scaffolds             | 40.97 K      | number of scaffolds                                   |
| Long scaffolds                  | 9.23 K       | number of scaffolds (length $\geq$ 10 kb)             |
| Contig N50                      | 30.07 Kb     | N50 contig size                                       |
| Scaffolds N50                   | 1.10 Mb      | N50 scaffold size                                     |
| Gap 10KB                        | 3.71%        | % of long gap (gap length $\geq$ 10 kb)               |
| Assembly size                   | 1.67 Gb      | assembly size                                         |
| Assembly size of long scaffolds | 1.55 Gb      | assembly size of long scaffolds (length $\geq$ 10 kb) |
| Assembly GC content             | 38.89%       | GC content of assembly                                |
