# Supplementary material for: Identification of Daboia siamensis venome using integrated multi-omics data
Source: PubMed Central journal article supplement (PMC9338987; doi:10.1038/s41598-022-17300-1), 2022-07-30
Supplement: 41598_2022_17300_MOESM5_ESM.pdf [file 41598_2022_17300_MOESM5_ESM.pdf]

**Table S3.** Contig and scaffold statistics of short and linked- read technology

| Sequencing Technology | Assembler Software | Scaffold Statistics |           |
|-----------------------|--------------------|---------------------|-----------|
|                       |                    | N50                 | #Scaffold |
| 10x linked-read       | Supernova          | 1.10 Mb             | 40.97 K   |
| Illumina HiseqX       | SOAPdenovo2        | 16.76 Kb            | 141.16 K  |
