# Supplementary material for: Identification of Daboia siamensis venome using integrated multi-omics data
Source: PubMed Central journal article supplement (PMC9338987; doi:10.1038/s41598-022-17300-1), 2022-07-30
Supplement: 41598_2022_17300_MOESM6_ESM.pdf [file 41598_2022_17300_MOESM6_ESM.pdf]

**Table S4.** Result of annotation process reported from MAKER <sup>1</sup>.

| Measurement         | Value    |
|---------------------|----------|
| Number of genes     | 19691    |
| Number of mRNAs     | 19772    |
| Number of exons     | 72598    |
| Number of introns   | 52826    |
| Number of CDS       | 19772    |
| Overlapping genes   | 33       |
| Contained genes     | 10       |
| Total gene length   | 87768215 |
| Total mRNA length   | 87927865 |
| Total exon length   | 14851466 |
| Total intron length | 73182051 |
| Total CDS length    | 14038365 |
| Shortest gene       | 3        |
| Shortest mRNA       | 3        |
| Shortest exon       | 1        |
| Shortest intron     | 20       |
| Shortest CDS        | 3        |
| Longest gene        | 67598    |
| Longest mRNA        | 67598    |
| Longest exon        | 11561    |
| Longest intron      | 17203    |
| Longest CDS         | 13350    |
| mean gene length    | 4457     |
| mean mRNA length    | 4447     |
| mean exon length    | 205      |
| mean intron length  | 1385     |
| mean CDS length     | 710      |

## References

- 1 Holt, C. & Yandell, M. MAKER2: an annotation pipeline and genome-database management tool for second-generation genome projects. *BMC Bioinformatics* 12, 491, doi:10.1186/1471-2105-12-491 (2011).
